# Supplementary material for: Role of phosphorylation of Cdc20 in the regulation of the action of APC/C in mitosis
Source: PubMed Central journal article supplement — Proc Natl Acad Sci U S A. 2022 Aug 24;119(35):e2210367119. doi: 10.1073/pnas.2210367119 (PMC9436321; doi:10.1073/pnas.2210367119), 2022-08-24
Supplement: pnas.2210367119.sapp.pdf [file pnas.2210367119.sapp.pdf]

## Supporting information

### Role of phosphorylation of Cdc20 in the regulation of the action of APC/C in mitosis.

Danielle Shevah-Sitry, Shirly Miniowitz-Shemtov, Adar Teichner, Sharon Kaisari and Avram Hershko<sup>1</sup>

Department of Biochemistry, the Rappaport Faculty of Medicine, Technion- Israel Institute of Technology, Haifa 31096, Israel.

<sup>1</sup> Corresponding author.

Email: [hershko@technion.ac.il](mailto:hershko@technion.ac.il)

**This PDF file includes:**

Figures S1 to S3

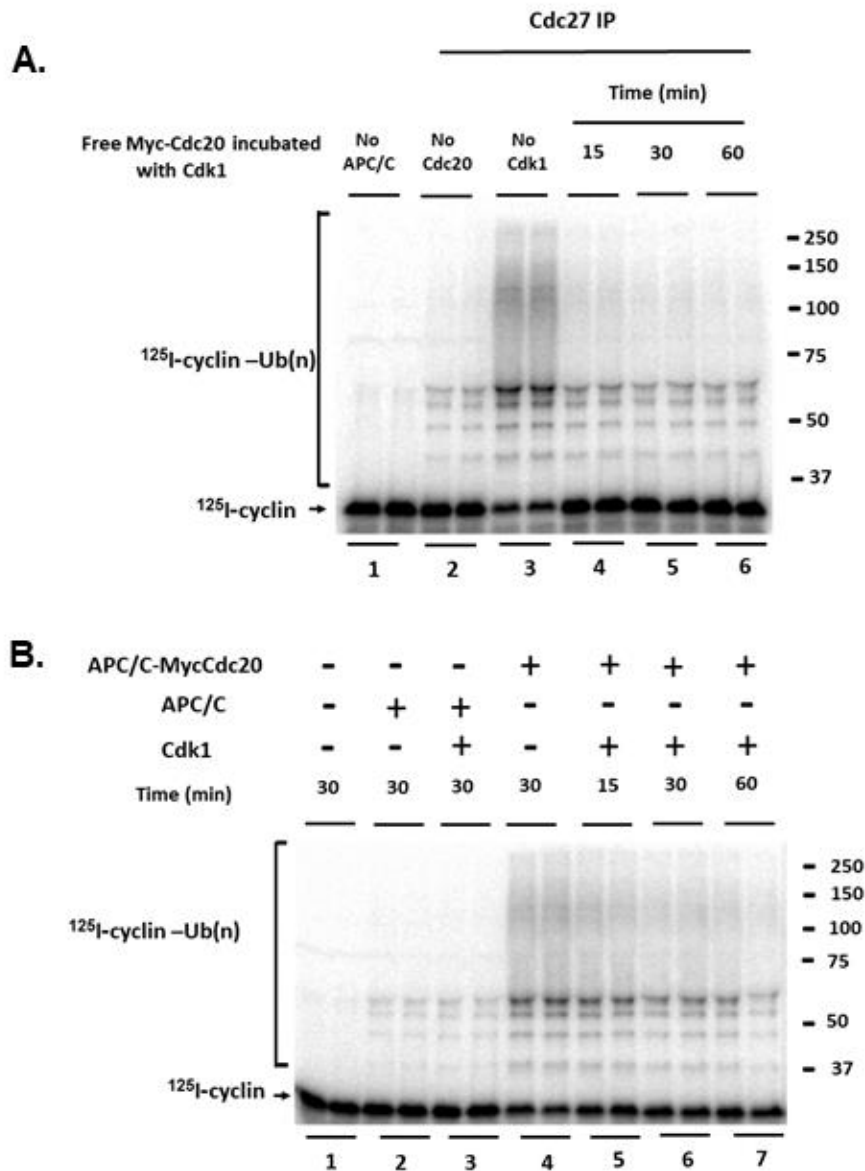

Fig. S1. Effects of phosphorylation of free or APC/C-bound myc-Cdc20 on the activity of APC/C. (A) Time-course of the effects of Cdk1-catalyzed phosphorylation of free myc-Cdc20 on its stimulation of APC/C activity. The experiment was similar to that described for Fig. 2A, *upper panel*, except that samples were not subjected to treatment with lambda phosphatase. The activity of APC/C in the ubiquitylation of <sup>125</sup>I-cyclin B was determined as described under *Materials and Methods*, in samples

of 1  $\mu$ l of APC/C beads. “No Cdc20”, activity of endogenous APC/C without added myc-Cdc20. Numbers on the right indicate the position of molecular mass marker proteins. (B) Time-course of the effects of Cdk1-catalyzed phosphorylation of APC/C-bound Cdc20 on APC/C activity. The experiment was similar to that described under Fig. 2A, *lower panel*, but without lambda phosphatase treatment of samples. APC/C activity was assayed as described under *Materials and Methods*, in samples of 1  $\mu$ l of anti-Cdc27 beads containing either APC/C without myc-Cdc20 (lanes 2, 3) or APC/C to which myc-Cdc20 had been bound (lanes 4-7).

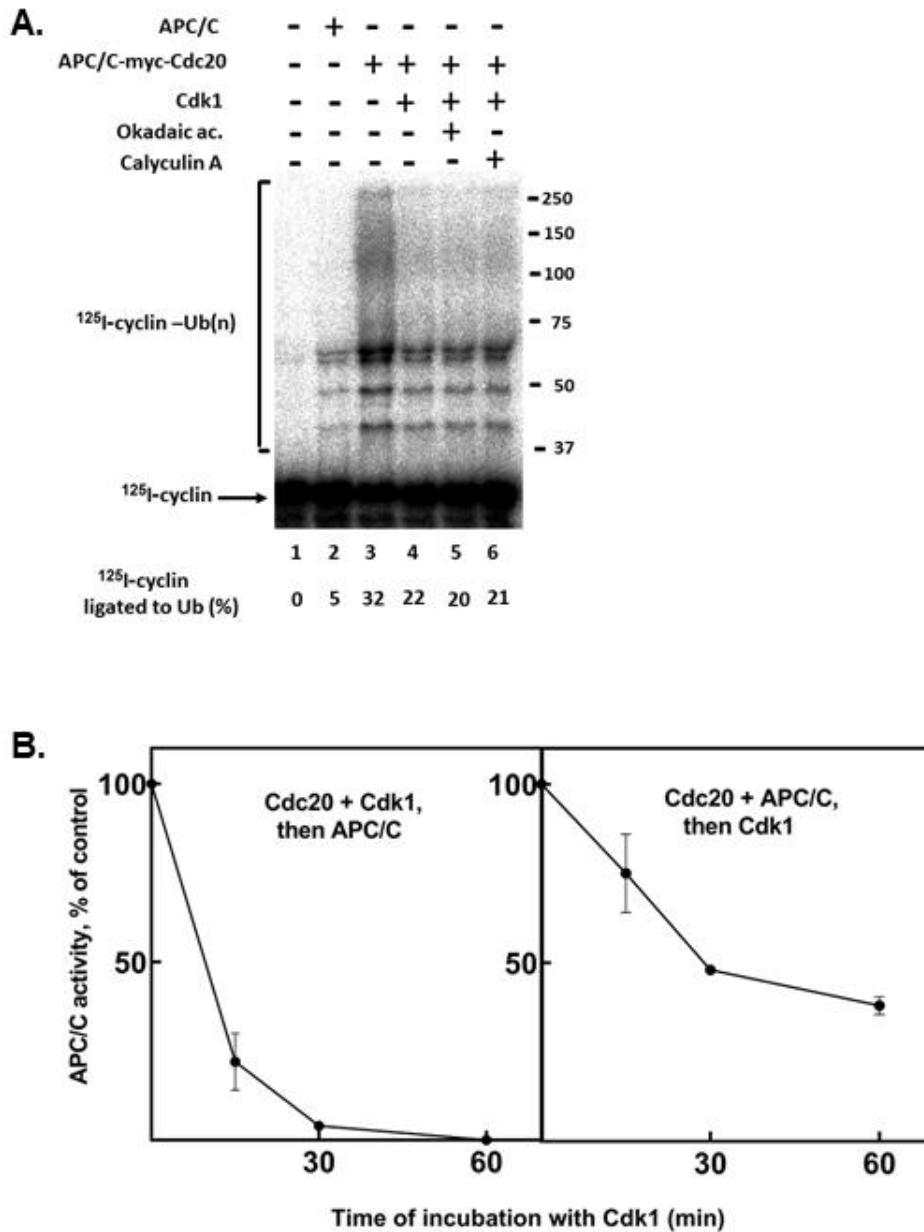

Fig. S2. (A) Effects of okadaic acid and calyculin A on the activity of APC/C-mycCdc20 incubated with Cdk1. Immunopurified APC/C to which myc-Cdc20 has been bound (“APC/C-myc-Cdc20”) was incubated under conditions as in Fig. 2A, with additions as indicated. Okadaic acid and calyculin A were supplemented at 0.5  $\mu\text{M}$ . Following incubation at 23°C for 30 min, beads were washed and APC/C activity was

determined as described under *Materials and Methods*. (B) Preincubation of APC/C from HeLa cells with Cdc20 reduces the extent of the inhibition of its action by Cdk1. Phosphorylated APC/C was immunopurified from extracts of mitotic HeLa cells as described under *Materials and Methods*. *Left panel*, “Cdc20 + Cdk1, then APC/C” : Free myc-Cdc20 was first incubated with Cdk1 and ATP, under conditions similar to those described in Fig. 2A, except that the reaction volume was 10  $\mu$ l, and incubations were carried out at 18 °C. Cdk1 action was terminated by at the times indicated by the addition of 3  $\mu$ M p27<sup>kip1</sup>, and then samples were mixed with HeLa cell APC/C (on 1  $\mu$ l of anti-Cdc27 beads), at 1,400 rpm for 15 min. Finally, ubiquitylation mixture containing <sup>125</sup>I-cyclin B (*see Materials and Methods*) was added and incubation was continued at 18 °C for 30 min, with shaking at 1,400 rpm. *Right panel*, “Cdc20 + APC/C, then Cdk1”: Experimental conditions were similar to those described for left panel, except that the order of incubations was reversed, so that myc-Cdc20 was first mixed with APC/C from HeLa cells for 15 min, then Cdk1 was added for the time periods indicated, followed by <sup>125</sup>I-cyclin B ubiquitylation mixture. Results were expressed as in Fig. 2C.

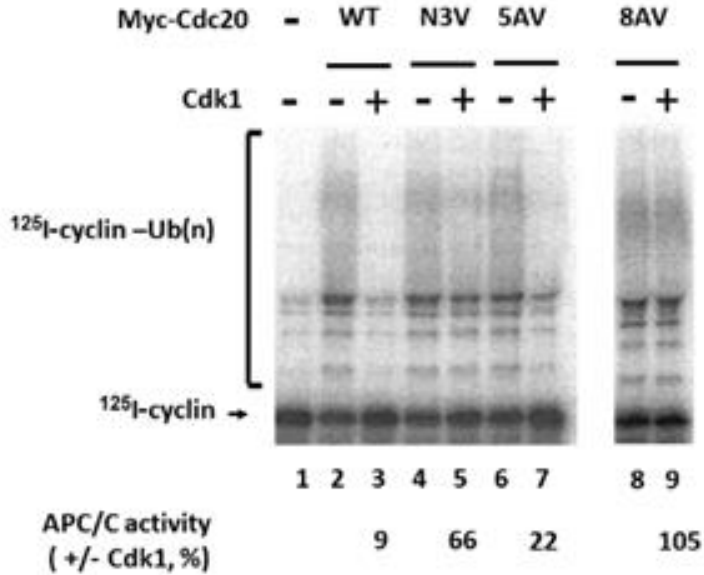

Fig. S3. Effects of Cdk1-catalyzed phosphorylation of different free phosphorylation site mutants of Cdc20 on their action to stimulate the activity of APC/C. Wild type ("WT") myc-Cdc20 or its mutants as indicated, were incubated (23 °C, 30 min) with or without Cdk1, under conditions similar to those described in Fig. 2A, and then were added to immunopurified APC/C on anti-Cdc27 beads, as described under *Materials and Methods*. The activity of APC/C on ubiquitylation of  $^{125}\text{I}$ -cyclin B (see *Materials and Methods*) was estimated in samples of 1  $\mu\text{l}$  APC/C beads. The activity of APC/C following treatment of Cdc20 constructs with Cdk1 was expressed as the percentage of respective controls incubated without Cdk1.
